# Supplementary material for: Effects of vitamin E on stroke: a systematic review with meta-analysis and trial sequential analysis
Source: HighWire-hosted journal article supplement (doi:10.1136/svn-2020-000519), 2020-10-27
Supplement: svn-2020-000519supp001_data_supplement.pdf [file svn-2020-000519supp001_data_supplement.pdf]

## Supplementary Material

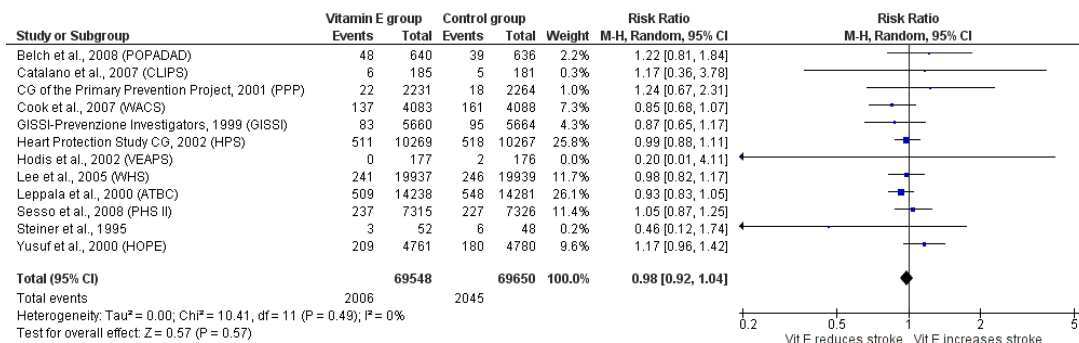

**Figure S1.** Forest plot for the relative risks of the effect of vitamin E on total stroke for individual trials and for the pooled population.

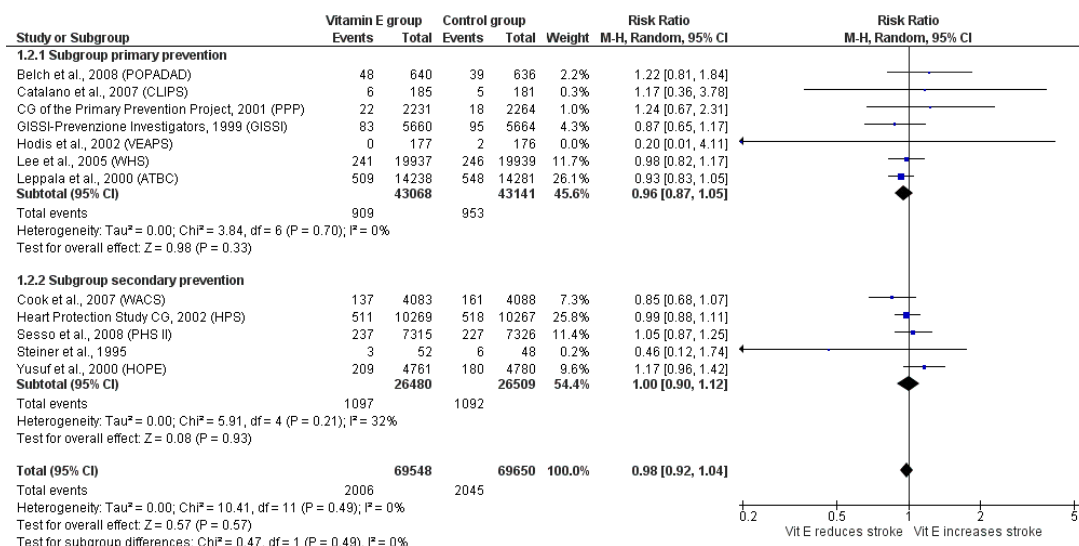

**Figure S2.** Forest plot for the relative risks of the effect of vitamin E on total stroke for individual trials and for the pooled population (Type of prevention subgroup).

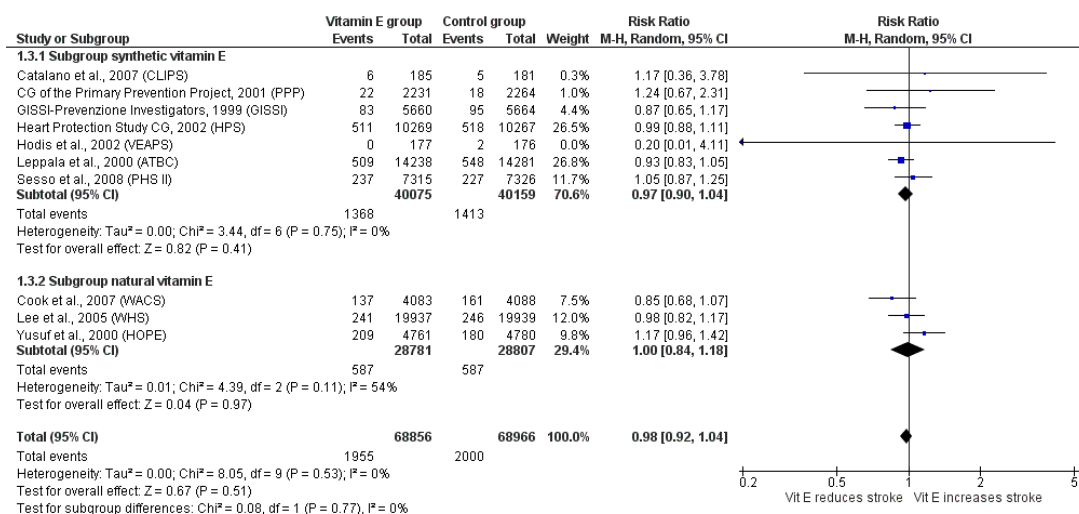

**Figure S3.** Forest plot for the relative risks of the effect of vitamin E on total stroke for individual trials and for the pooled population (Source of vitamin E subgroup).

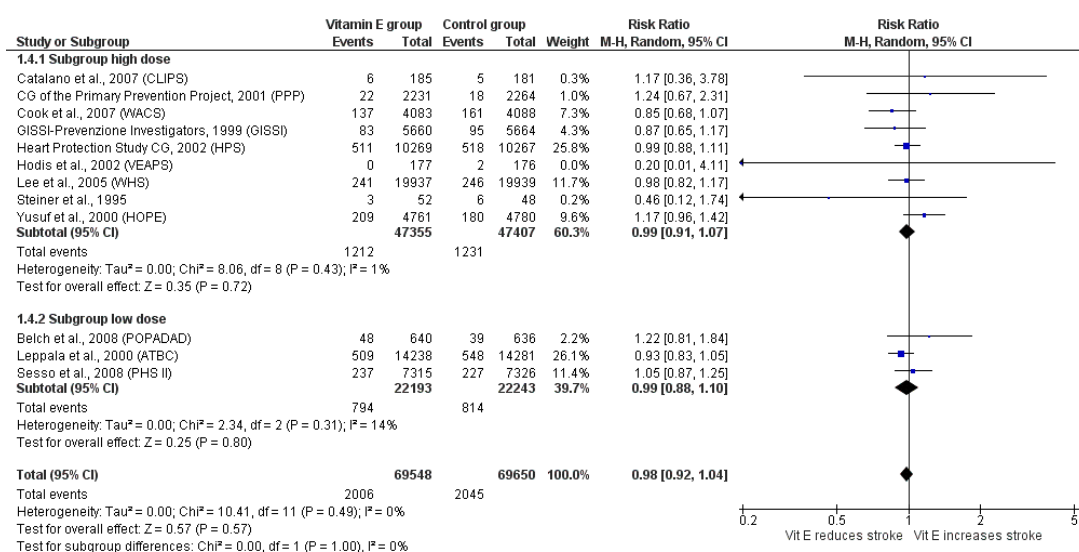

**Figure S4.** Forest plot for the relative risks of the effect of vitamin E on total stroke for individual trials and for the pooled population (Dosage of vitamin E subgroup).

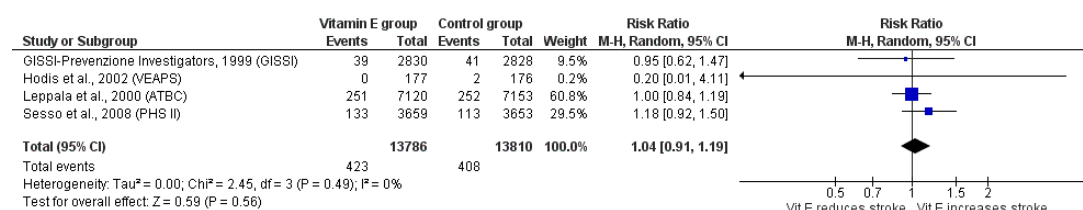

**Figure S5.** Forest plot for the relative risks of the effect of vitamin E on total stroke for individual trials and for the pooled population (Vitamin E alone).

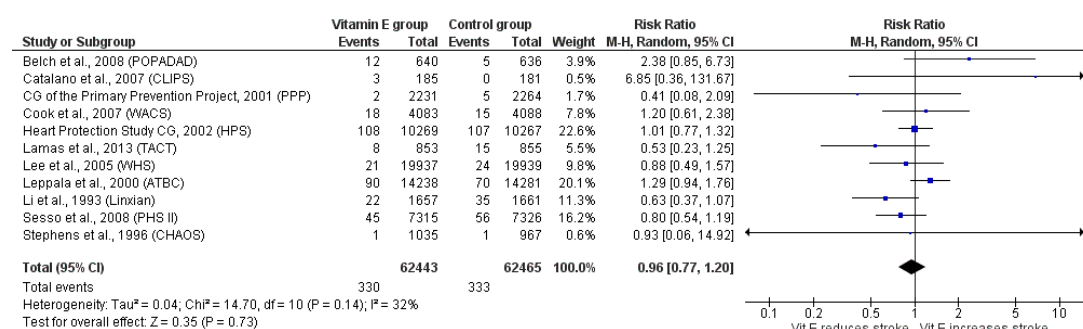

**Figure S6.** Forest plot for the relative risks of the effect of vitamin E on fatal stroke for individual trials and for the pooled population.

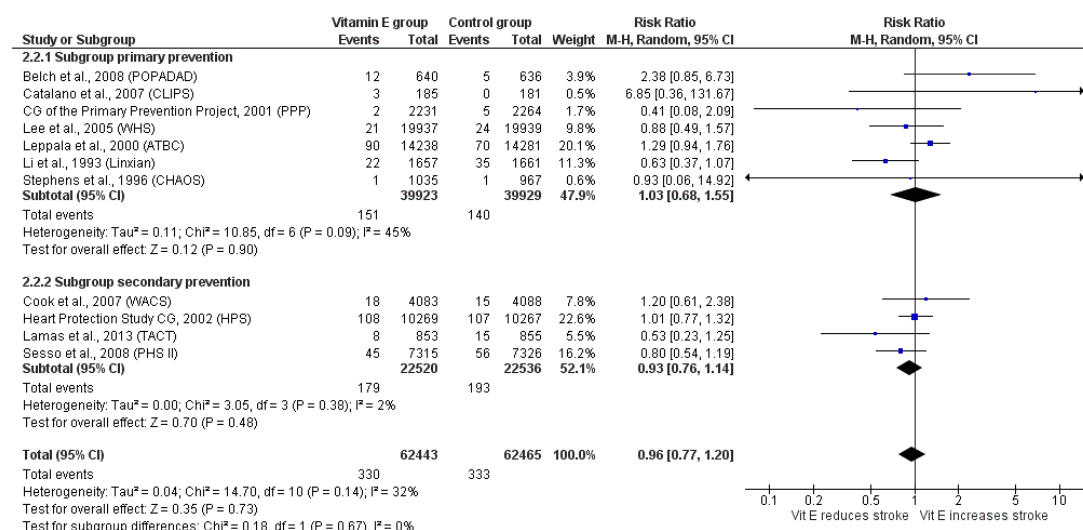

**Figure S7.** Forest plot for the relative risks of the effect of vitamin E on fatal stroke for individual trials and for the pooled population (Type of prevention subgroup).

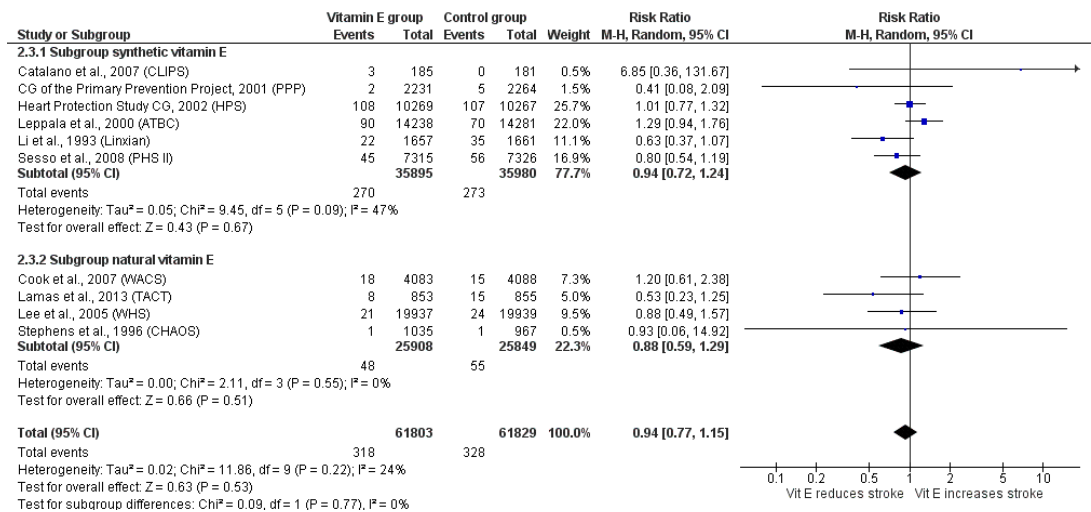

Figure S8. Forest plot for the relative risks of the effect of vitamin E on fatal stroke for individual trials and for the pooled population (Source of vitamin E subgroup).

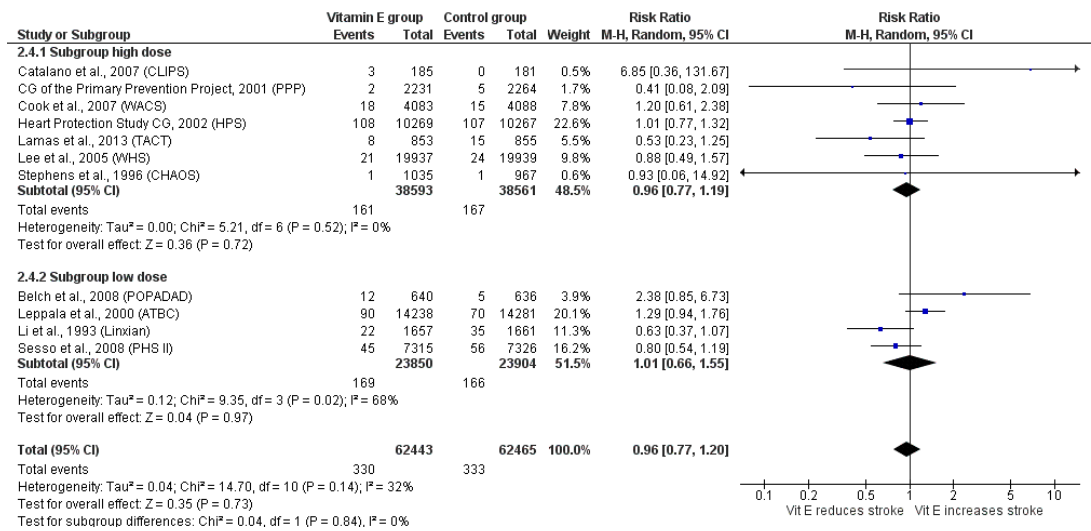

Figure S9. Forest plot for the relative risks of the effect of vitamin E on fatal stroke for individual trials and for the pooled population (Dosage of vitamin E subgroup).

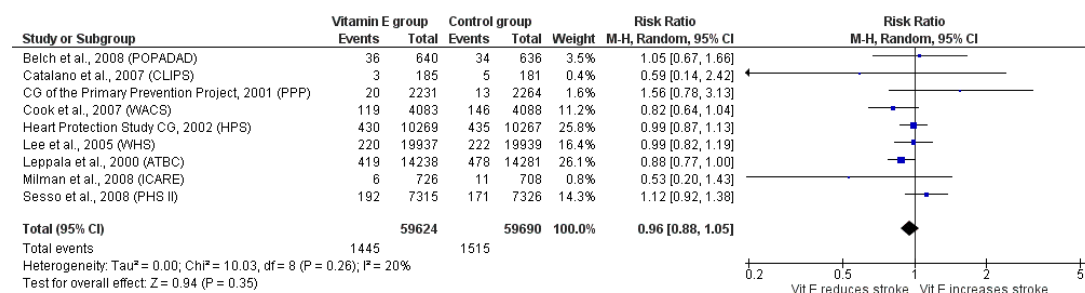

**Figure S10.** Forest plot for the relative risks of the effect of vitamin E on non-fatal stroke for individual trials and for the pooled population.

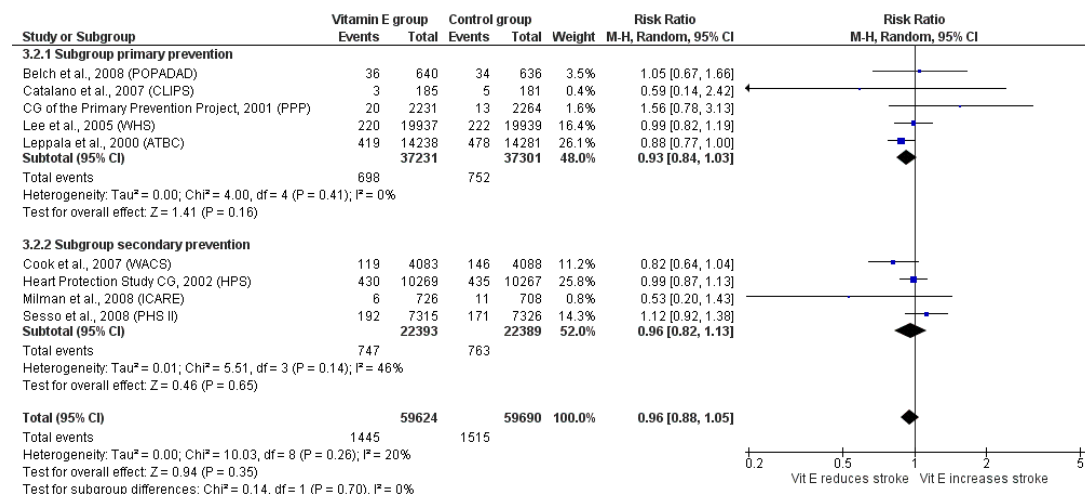

**Figure S11.** Forest plot for the relative risks of the effect of vitamin E on non-fatal stroke for individual trials and for the pooled population (Type of prevention subgroup).

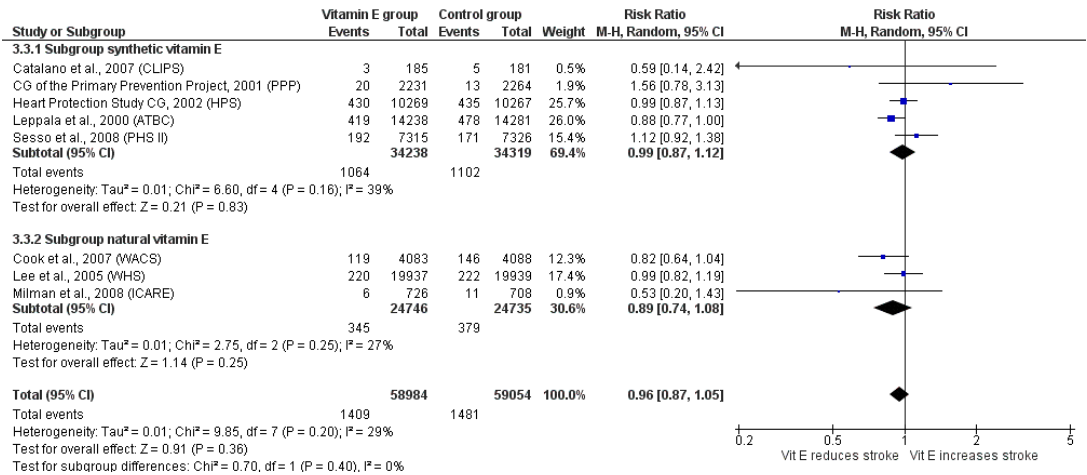

**Figure S12.** Forest plot for the relative risks of the effect of vitamin E on non-fatal stroke for individual trials and for the pooled population (Source of vitamin E subgroup).

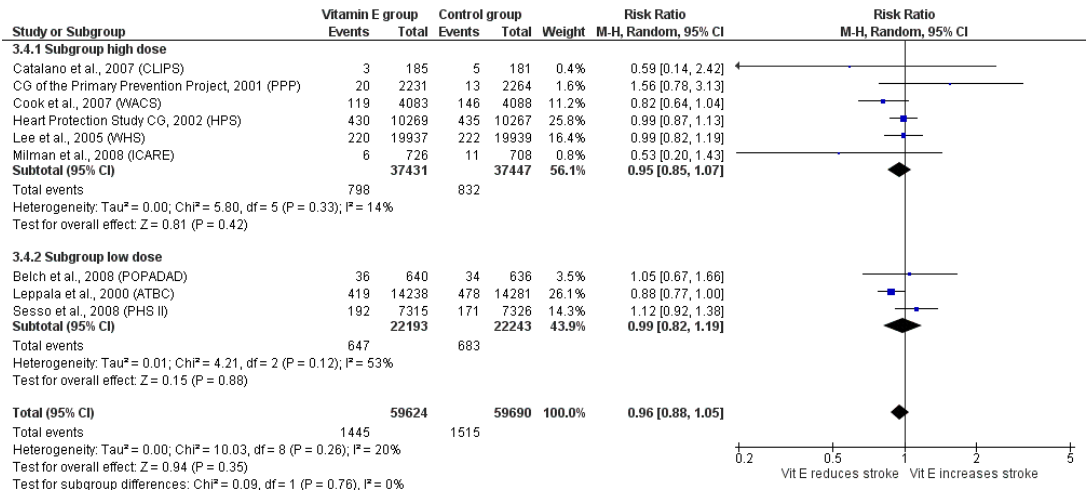

**Figure S13.** Forest plot for the relative risks of the effect of vitamin E on non-fatal stroke for individual trials and for the pooled population (Dosage of vitamin E subgroup).

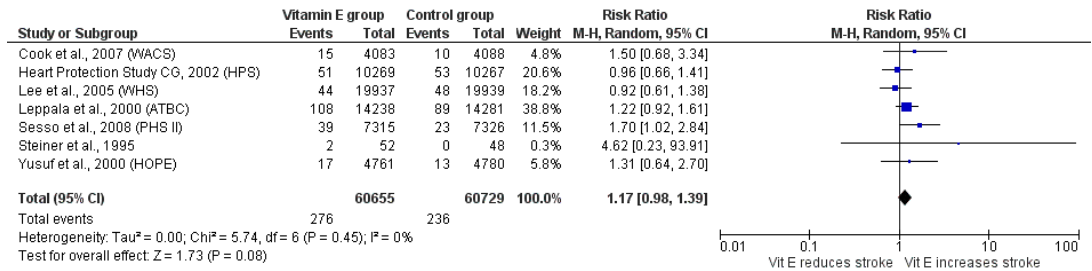

Figure S14. Forest plot for the relative risks of the effect of vitamin E on haemorrhagic stroke for individual trials and for the pooled population.

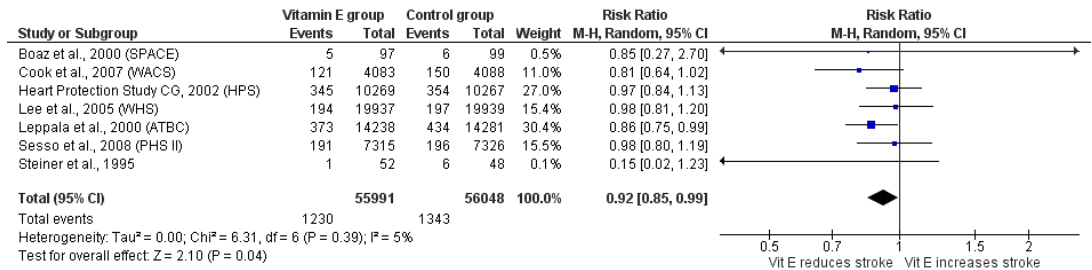

Figure S15. Forest plot for the relative risks of the effect of vitamin E on ischaemic stroke for individual trials and for the pooled population.

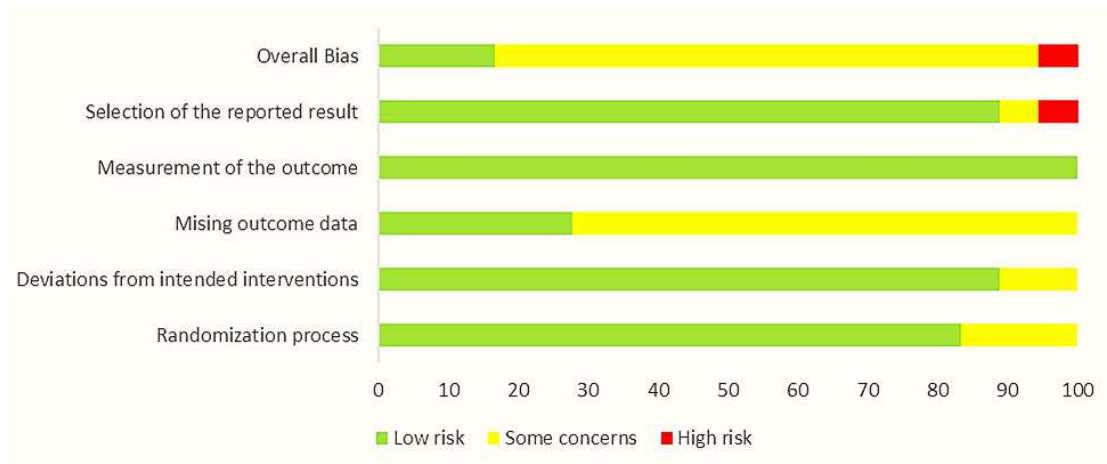

Figure S16. Risk of bias graph shows review authors' judgements about each risk of bias items presented as percentages across all included studies.

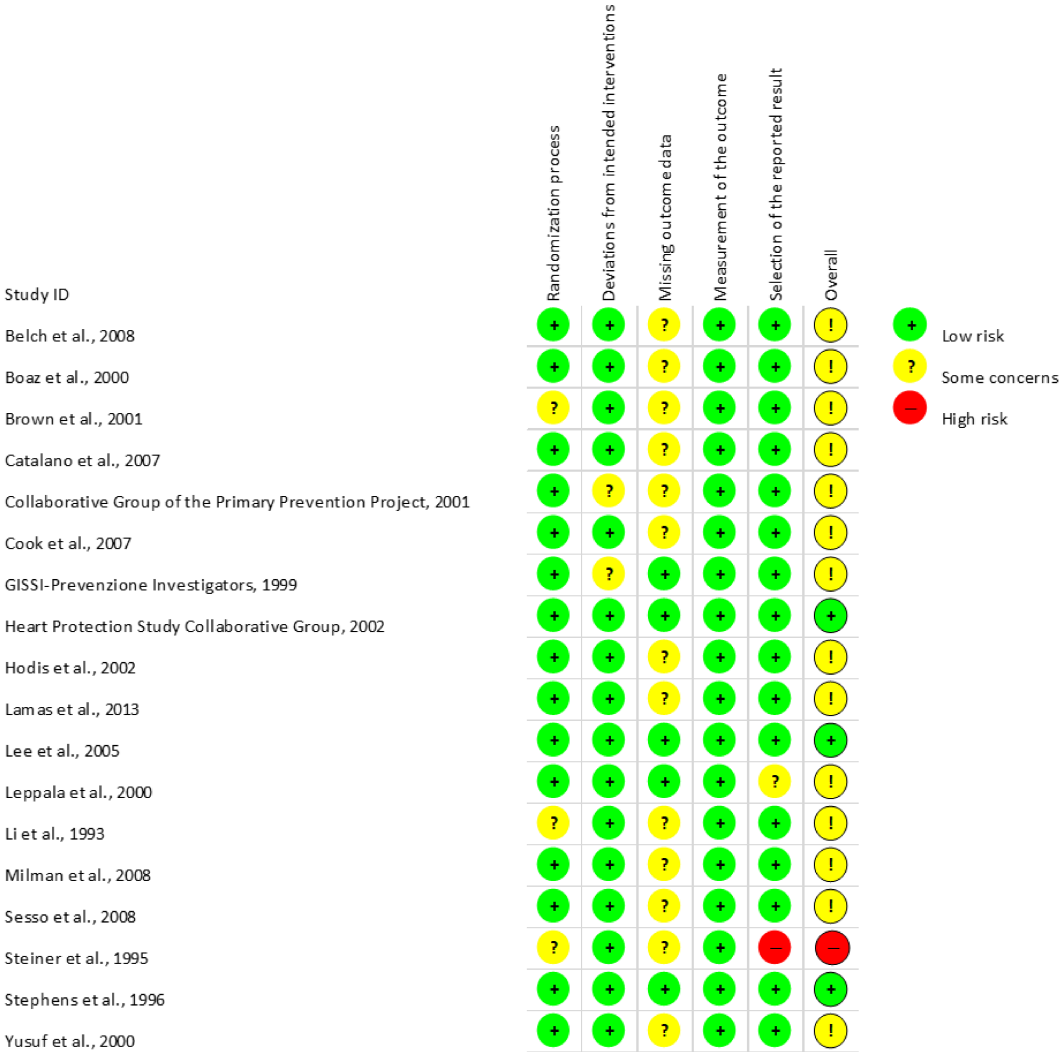

**Figure S17.** Risk of bias summary shows review authors’ judgements about each risk of bias items for each included study.



**Table S1.** GRADE quality assessment for the study findings was summarised as follows.

| Certainty assessment                           |                   |              |               |              |              |                      | № of patients     |                   | Effect                 |                                             | Certainty        | Importance |
|------------------------------------------------|-------------------|--------------|---------------|--------------|--------------|----------------------|-------------------|-------------------|------------------------|---------------------------------------------|------------------|------------|
| № of studies                                   | Study design      | Risk of bias | Inconsistency | Indirectness | Imprecision  | Other considerations | Vitamin E         | Control           | Relative (95% CI)      | Absolute (95% CI)                           |                  |            |
| The effect of vitamin E on total stroke        |                   |              |               |              |              |                      |                   |                   |                        |                                             |                  |            |
| 12                                             | randomised trials | serious      | not serious   | not serious  | not serious  | none                 | 2006/69548 (2.9%) | 2045/69650 (2.9%) | RR 0.98 (0.92 to 1.04) | 1 fewer per 1,000 (from 2 fewer to 1 more)  | ⊕⊕⊕⊖<br>MODERATE |            |
| The effect of vitamin E on fatal stroke        |                   |              |               |              |              |                      |                   |                   |                        |                                             |                  |            |
| 11                                             | randomised trials | not serious  | not serious   | not serious  | not serious  | none                 | 330/62443 (0.5%)  | 333/62465 (0.5%)  | RR 0.96 (0.77 to 1.20) | 0 fewer per 1,000 (from 1 fewer to 1 more)  | ⊕⊕⊕⊕<br>HIGH     |            |
| The effect of vitamin E on non fatal stroke    |                   |              |               |              |              |                      |                   |                   |                        |                                             |                  |            |
| 9                                              | randomised trials | not serious  | not serious   | not serious  | not serious  | none                 | 1445/59624 (2.4%) | 1515/59690 (2.5%) | RR 0.96 (0.88 to 1.05) | 1 fewer per 1,000 (from 3 fewer to 1 more)  | ⊕⊕⊕⊕<br>HIGH     |            |
| The effect of vitamin E on haemorrhagic stroke |                   |              |               |              |              |                      |                   |                   |                        |                                             |                  |            |
| 7                                              | randomised trials | serious      | not serious   | not serious  | very serious | none                 | 276/60655 (0.5%)  | 236/60729 (0.4%)  | RR 1.17 (0.98 to 1.39) | 1 more per 1,000 (from 0 fewer to 2 more)   | ⊕⊖⊖⊖<br>VERY LOW |            |
| The effect of vitamin E on ischaemic stroke    |                   |              |               |              |              |                      |                   |                   |                        |                                             |                  |            |
| 7                                              | randomised trials | serious      | not serious   | not serious  | not serious  | none                 | 1230/55991 (2.2%) | 1343/56048 (2.4%) | RR 0.92 (0.85 to 0.99) | 2 fewer per 1,000 (from 4 fewer to 0 fewer) | ⊕⊕⊕⊖<br>MODERATE |            |

CI: Confidence interval, RR: Risk ratio
